# Supplementary material for: Modification of the p-GaP(001) work function by surface dipole bonds formed in sulfide solution
Source: Royal Society of Chemistry journal article supplement (doi:10.1039/c9tc00210c), 2019-01-01
Supplement: c9tc00210c1.pdf [file c9tc00210c1.pdf]

## Supporting Information

### Modification of the p-GaP(100) surface with sulfide treatment

*Mikhail V. Lebedev, Peter A. Dementev, Tatiana V. Lvova, Vladimir L. Berkovits*

*Ioffe Institute, Politekhnicheskaya 26, St. Petersburg, 194021 Russia*

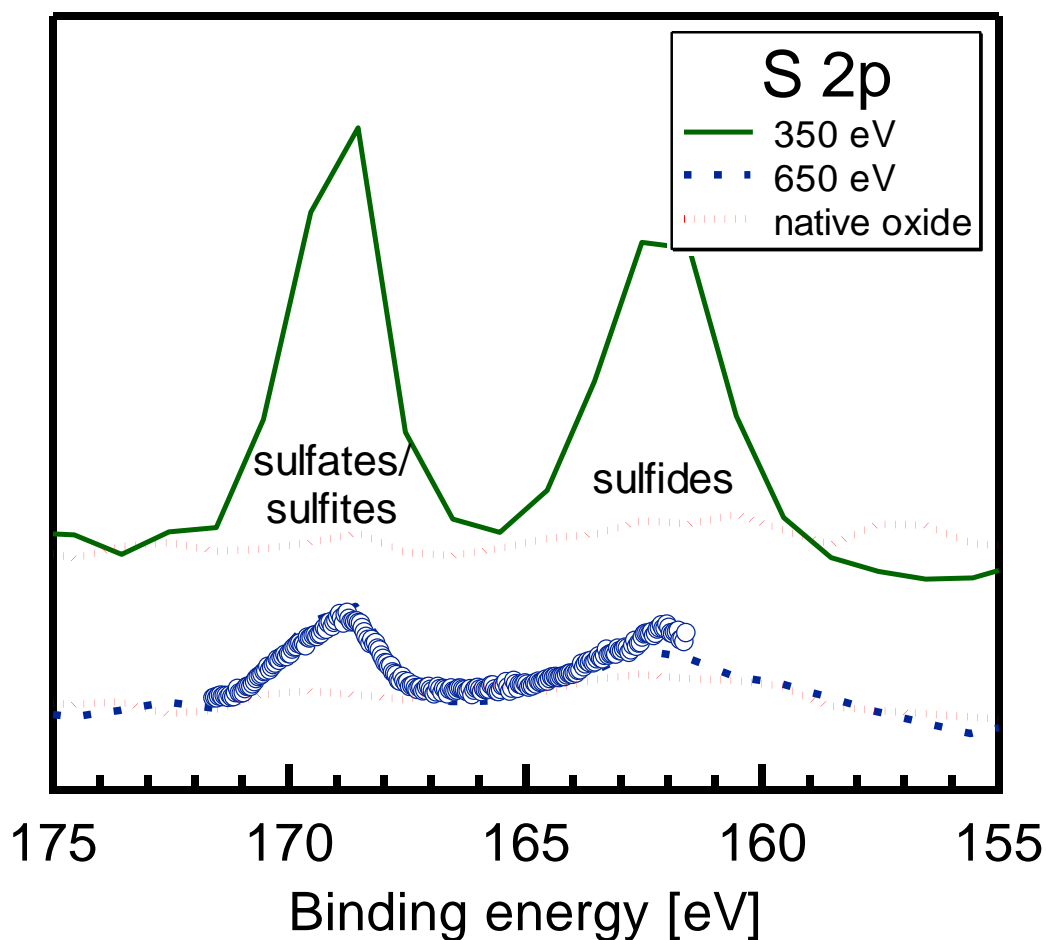

**Figure S1.** Portions of survey spectra containing the S 2p core level measured with different excitation energies on the p-GaP(100) surface treated with the solution of ammonium sulfide in 2-propanol. Red dot lines indicate corresponding part of the survey spectra measured on the initial native oxide covered p-GaP(100) surface prior to treatment with the sulfide solution.

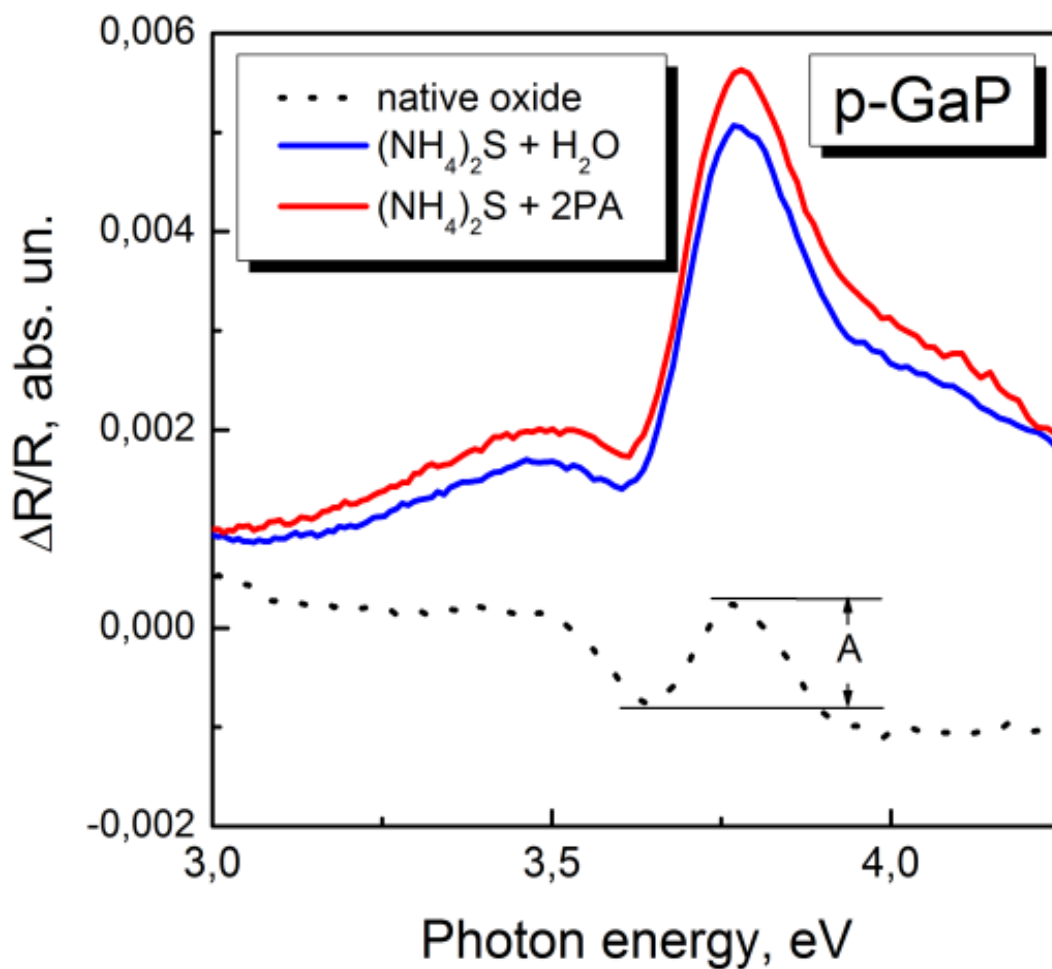

**Figure S2.** RA spectra of the native-oxide-covered p-GaP(001) surface measured before and after treatment with the aqueous solution of ammonium sulfide  $[(\text{NH}_4)_2\text{S} + \text{H}_2\text{O}]$ , or with the solution of ammonium sulfide in 2-propanol  $[(\text{NH}_4)_2\text{S} + 2\text{PA}]$ .
